# Supplementary material for: Desmoplastic stromal signatures predict patient outcomes in pancreatic ductal adenocarcinoma
Source: PubMed Central journal article supplement — Cell Rep Med. 2023 Oct 20;4(11):101248. doi: 10.1016/j.xcrm.2023.101248 (PMC10694604; doi:10.1016/j.xcrm.2023.101248), 2023-10-20
Supplement: mmc1.pdf [file mmc1.pdf]

**Cell Reports Medicine, Volume 4**

**Supplemental information**

**Desmoplastic stromal signatures**

**predict patient outcomes**

**in pancreatic ductal adenocarcinoma**

**Shamik Mascharak, Jason L. Guo, Deshka S. Foster, Anum Khan, Michael F. Davitt, Alan T. Nguyen, Austin R. Burcham, Malini S. Chinta, Nicholas J. Guardino, Michelle Griffin, David M. Lopez, Elisabeth Miller, Michael Januszyk, Shyam S. Raghavan, Teri A. Longacre, Daniel J. Delitto, Jeffrey A. Norton, and Michael T. Longaker**

# Supplemental Information

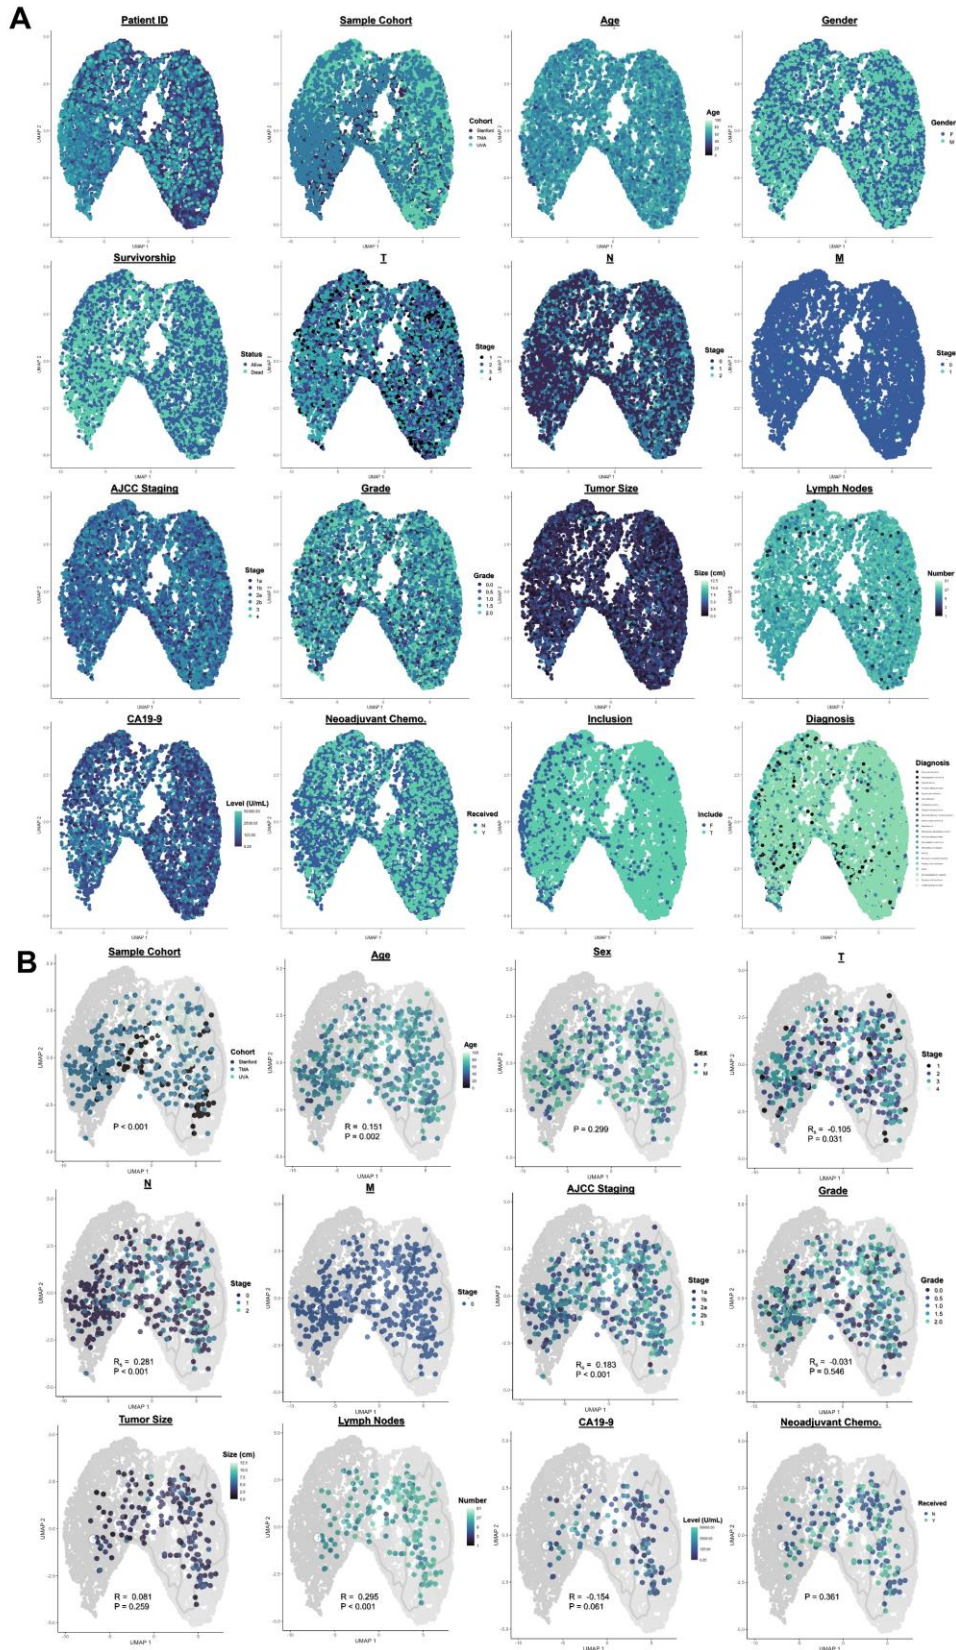

**Figure S1: Correlation of matrix architectural data with clinical characteristics, related to Figure 1. (A)**

Mapping of patient metadata (age, gender, stage, grade, etc.) onto the trajectory. **(B)** Localization of included patient-level centroids. Correlations of relevant metadata with patient-level pseudotime are shown as Pearson coefficients ( $R$ ) and associated p-values for continuous metadata (age, tumor size, lymph nodes, CA19-9), Spearman coefficients ( $R_s$ ) and associated p-values for ordinal metadata (T, N, AJCC stage, grade), and ANOVA p-values for categorical metadata (cohort, gender, neoadjuvant chemotherapy).

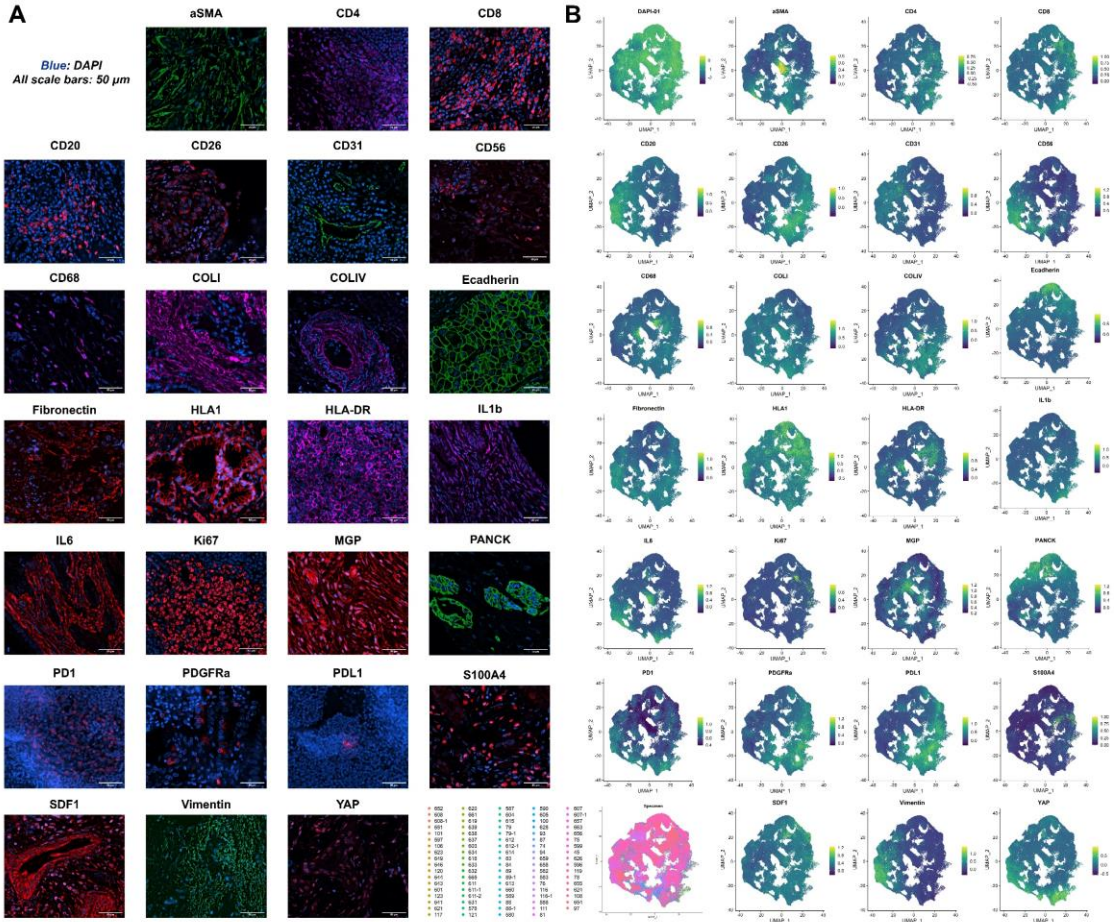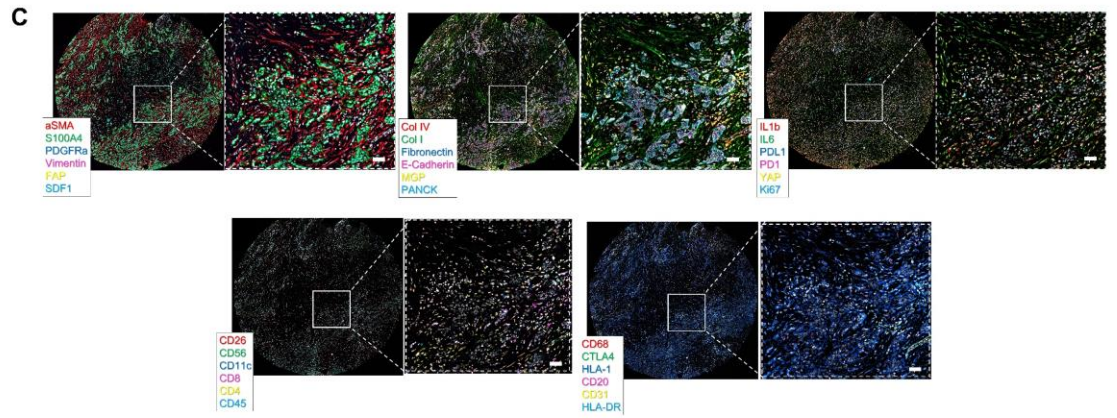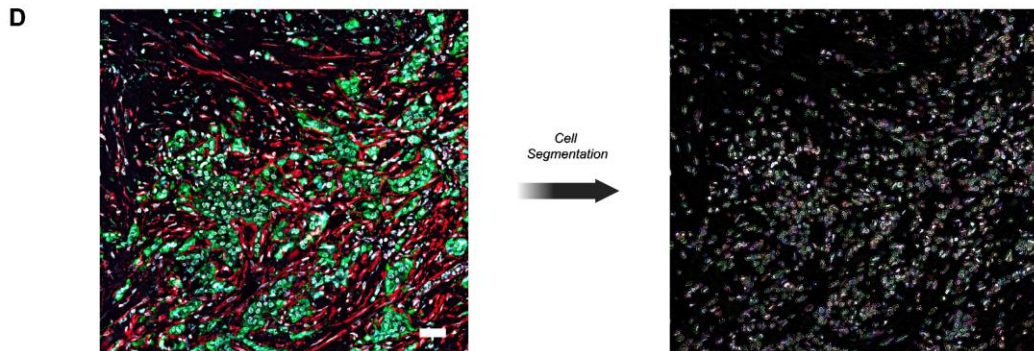

**Figure S2: CODEX markers and associated validation data, related to Figure 2.** (A) Validation of individual CODEX markers used for definition of cell phenotypes. Scale bars represent 50  $\mu\text{m}$ . (B) Feature plots of each corresponding CODEX marker, as well as specimen of origin (bottom left). (C) Visualizations of multiplexed staining, with zoomed-in areas of interest in white boxes. Scale bars represent 200  $\mu\text{m}$ . (D) Example of cell segmentation from DAPI staining in CODEX.

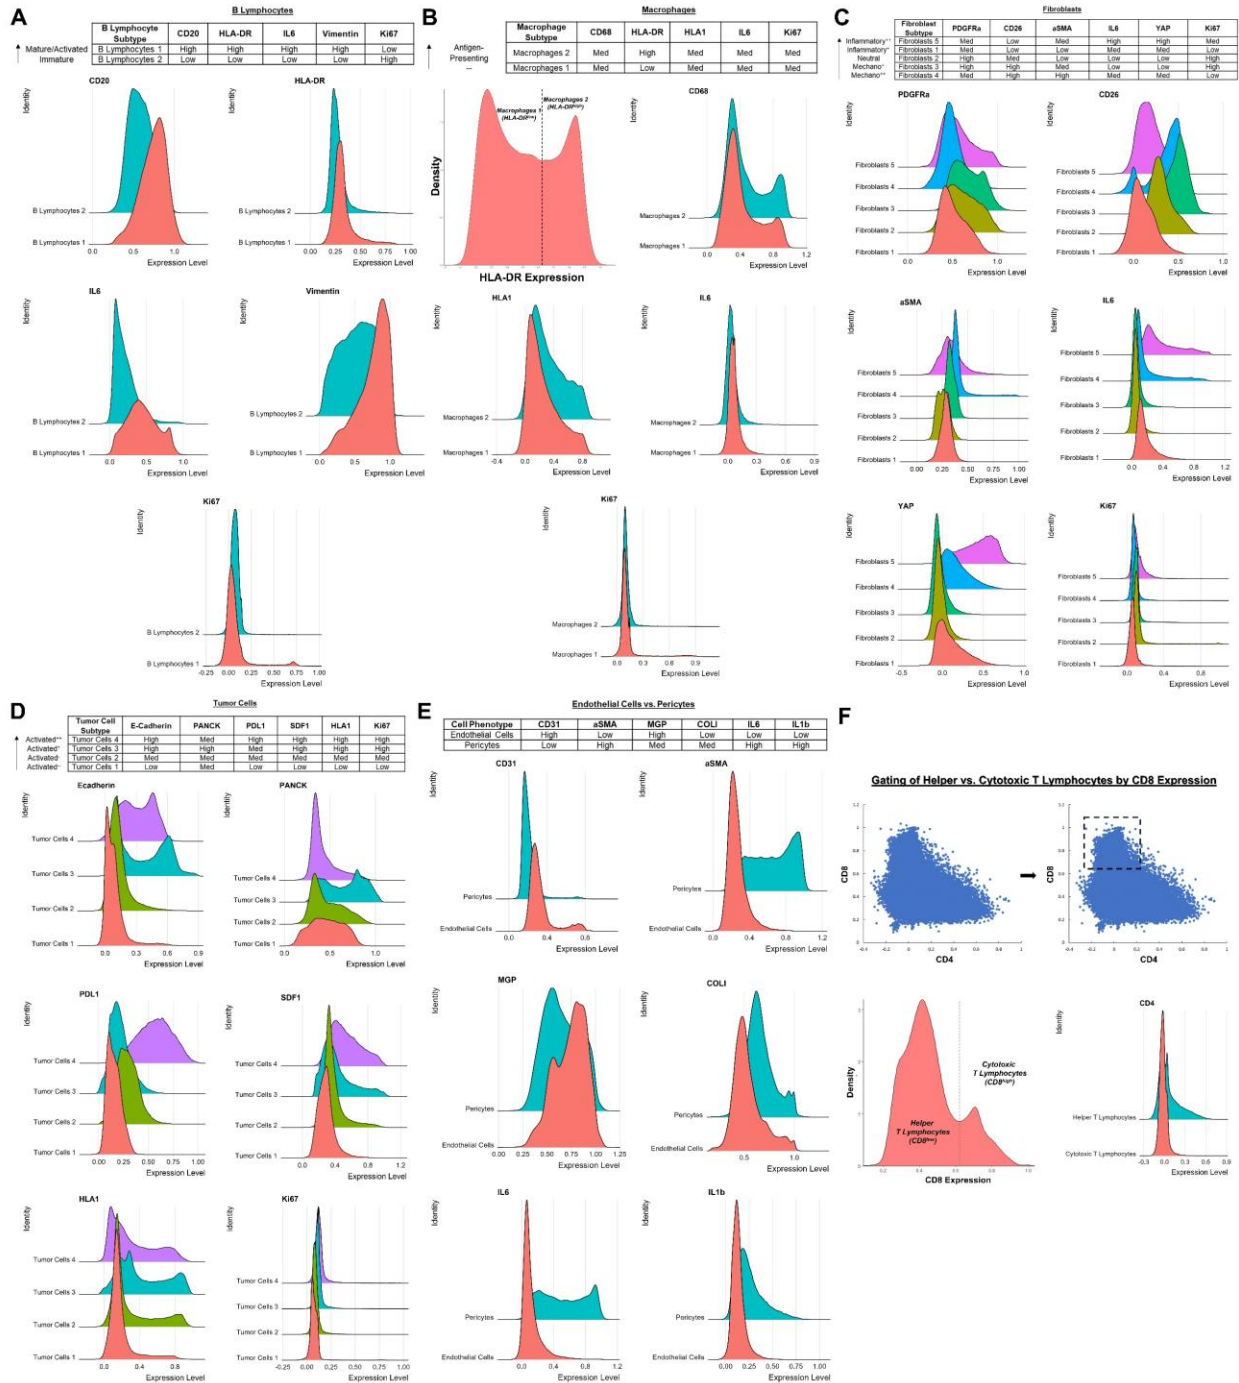

**Figure S3: Characteristic protein expression by cell subpopulations, related to Figure 2. (A)** Summary of differential protein expression by B lymphocyte subtypes, including profiles for CD20, HLA-DR, IL6, Vimentin, and Ki67. **(B)** Summary of differential protein expression by macrophage subtypes, including splitting of macrophage subtypes by HLA-DR expression and protein expression profiles for CD68, HLA1, IL6, and Ki67. **(C)** Summary of differential protein expression by fibroblast subtypes, including profiles for PDGFRa, CD26, aSMA,

IL6, YAP, and Ki67. **(D)** Summary of differential protein expression by tumor cell subtypes, including profiles for E-cadherin, PANCK, PDL1, SDF1, HLA1, and Ki67. **(E)** Summary of differential protein expression by endothelial cells and pericytes, including profiles for CD31, aSMA, MGP, COL1, IL6, and IL1b. **(F)** Summary of differential protein expression by T lymphocyte subtypes, including gating of T lymphocyte subtypes by CD8 expression in FACS-style scatter plot, CD8 density plot, and expression profile for CD4.

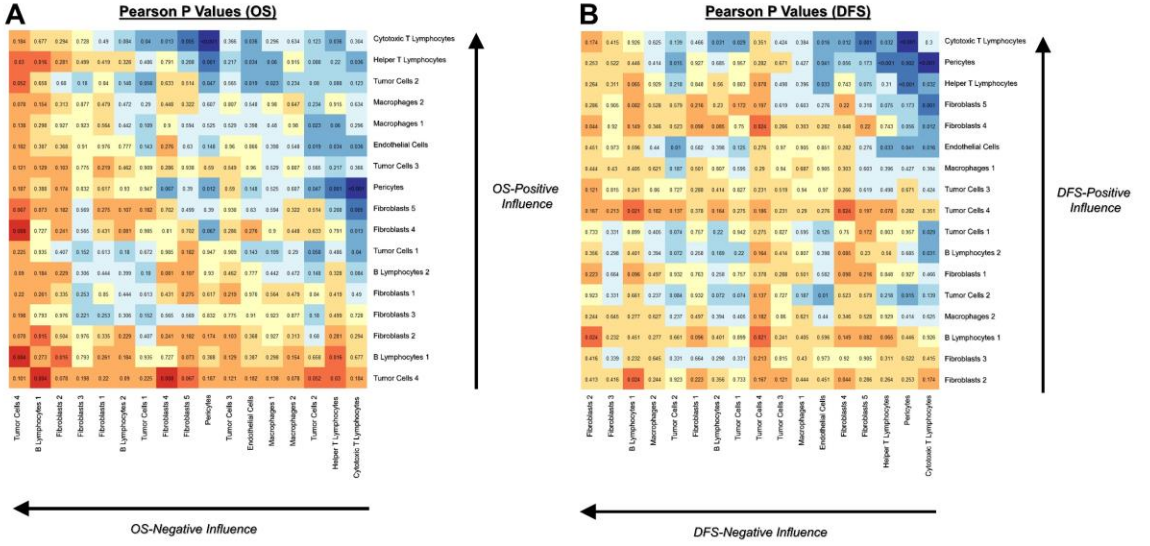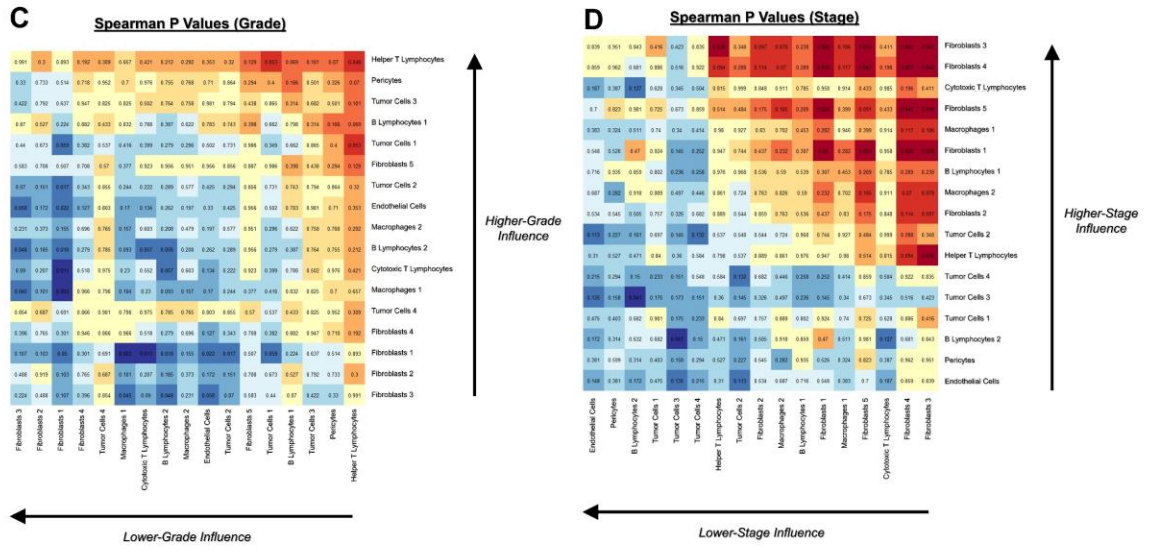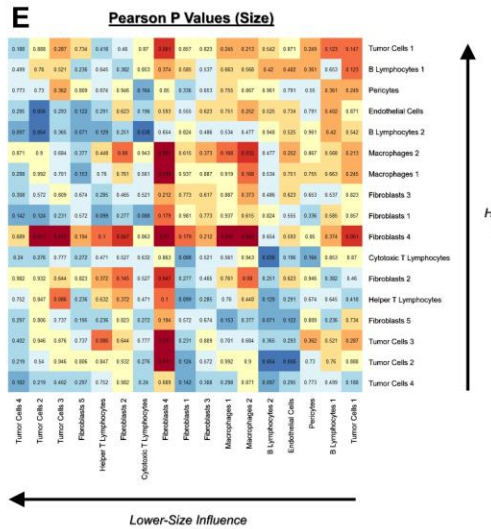



**Figure S4: P values for correlation between cell-cell spatial interactions and clinically relevant metrics, related to Figures 3 and 5. (A-E) P values for overall survival (A), disease-free survival (B), tumor grade (C), AJCC stage (D), and tumor size (E).**

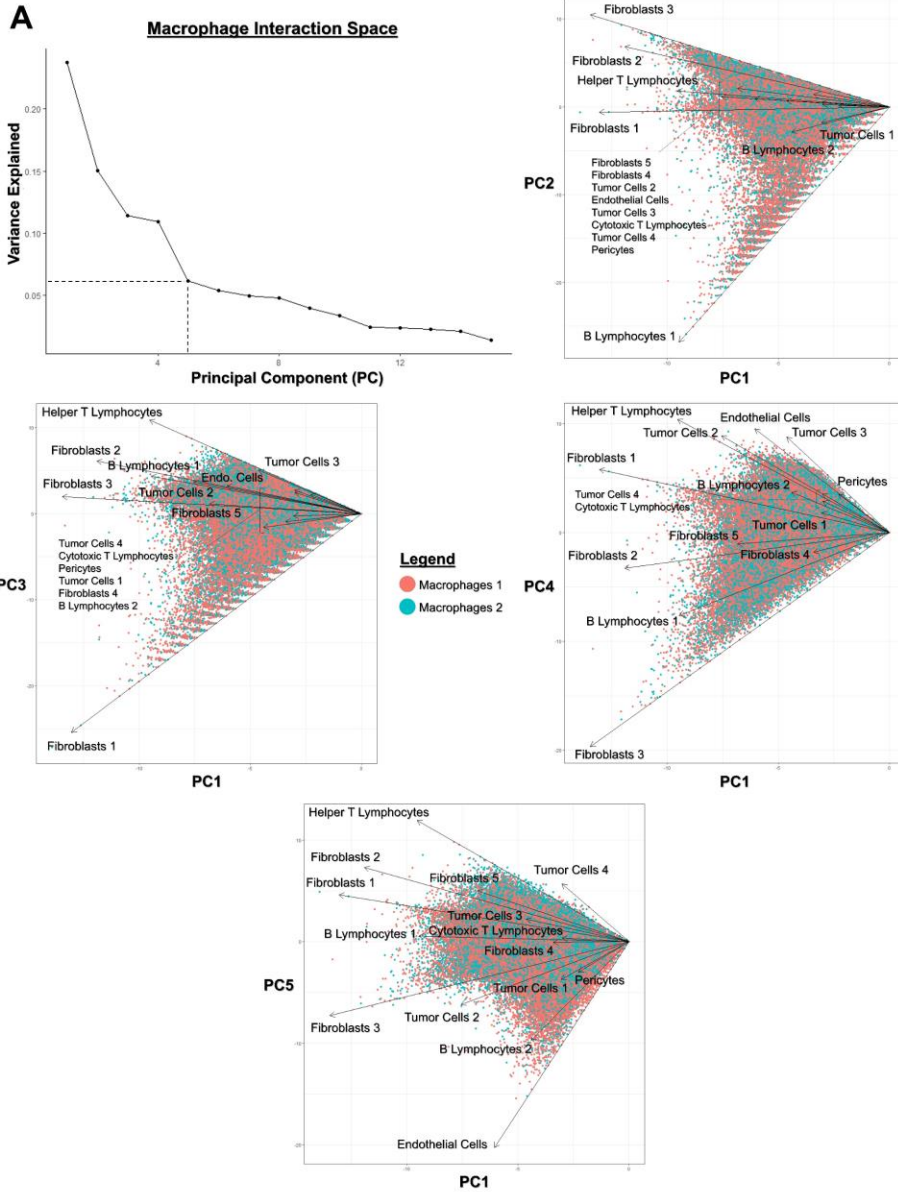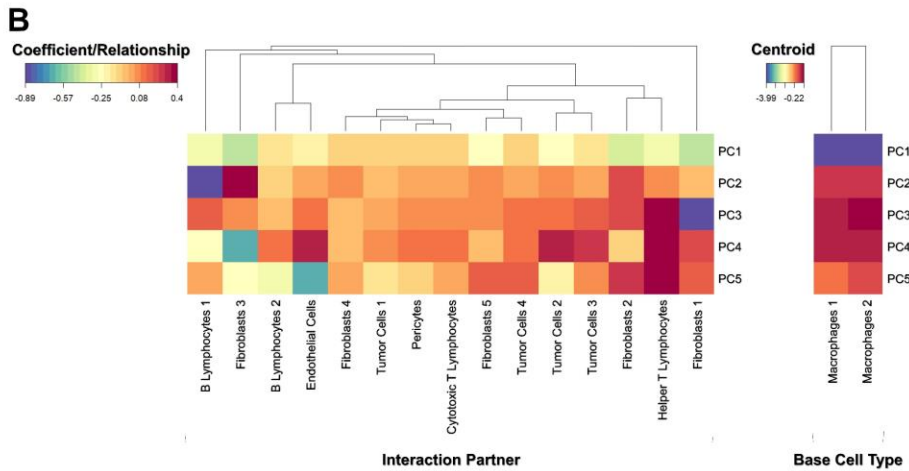

**Figure S5: The macrophage interactome and its variation with protein phenotype, related to Figure 6. (A)**

Principal component analysis (PCA) of interaction space up to 5 principal components, as determined by vertex of scree plot. Macrophages exhibit largely similar interaction patterns, albeit with some differences in adjacency with helper T lymphocytes based on protein phenotype. (B) Heatmaps of PCA coefficients and centroids for each macrophage subtype.

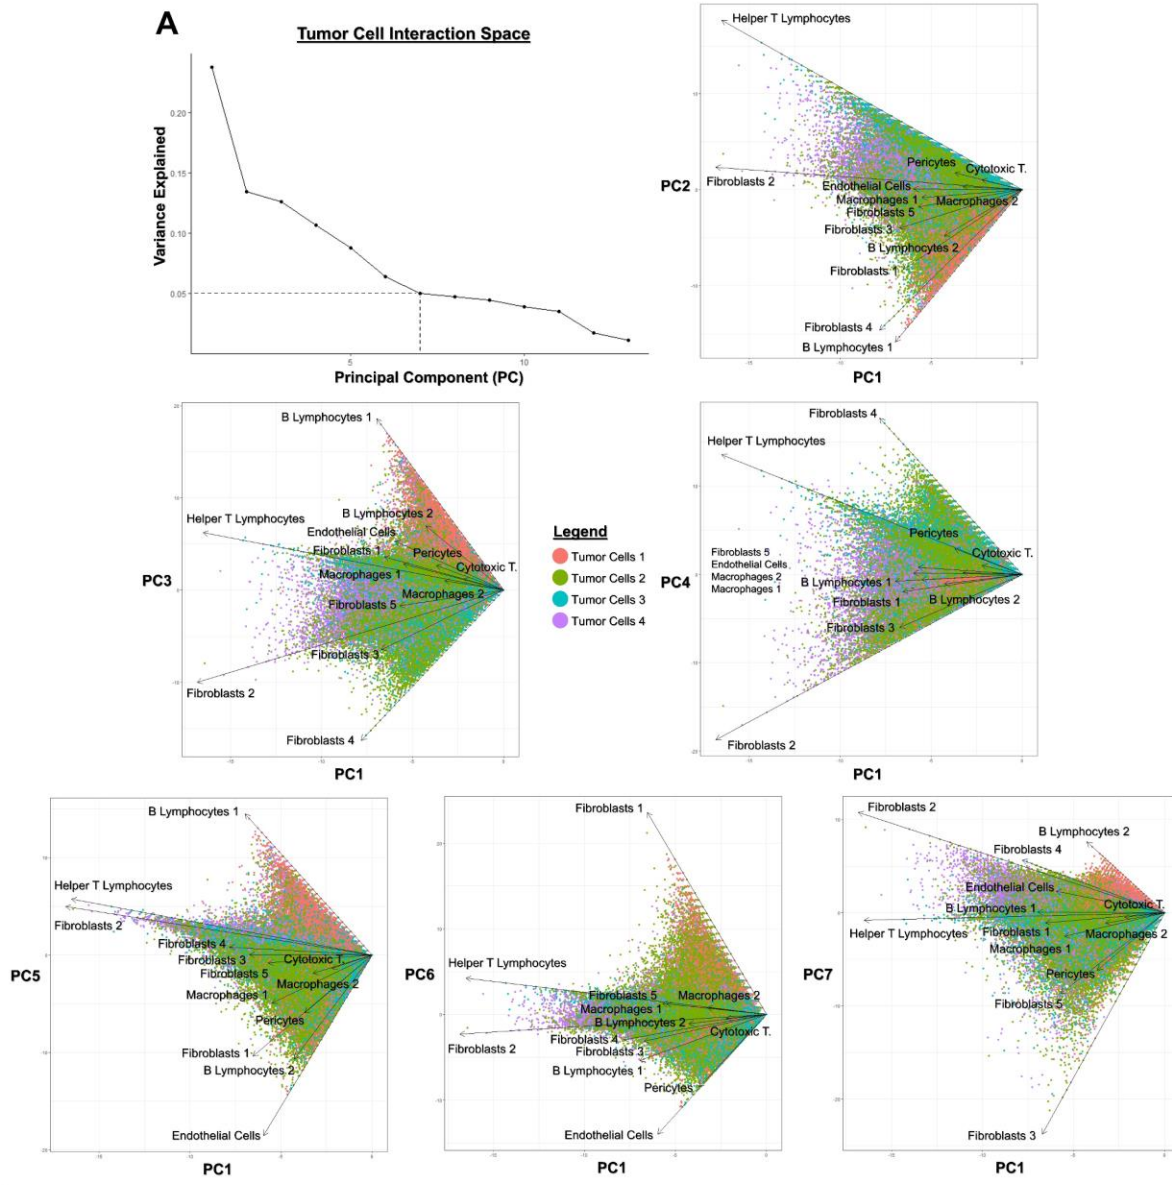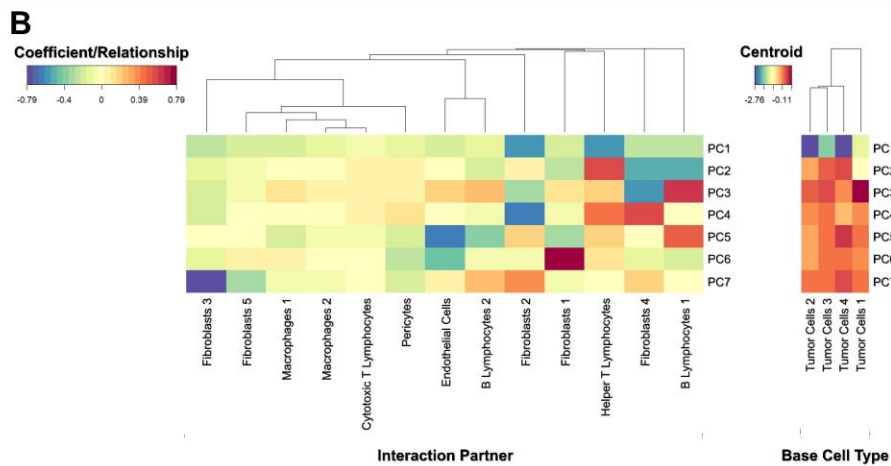

**Figure S6: The tumor cell interactome and its variation with protein phenotype, related to Figure 6. (A)**

Principal component analysis (PCA) of interaction space up to 7 principal components, as determined by vertex of scree plot. Tumor cells exhibit highly heterogeneous interaction patterns. **(B)** Heatmaps of PCA coefficients and centroids for each fibroblast subtype.

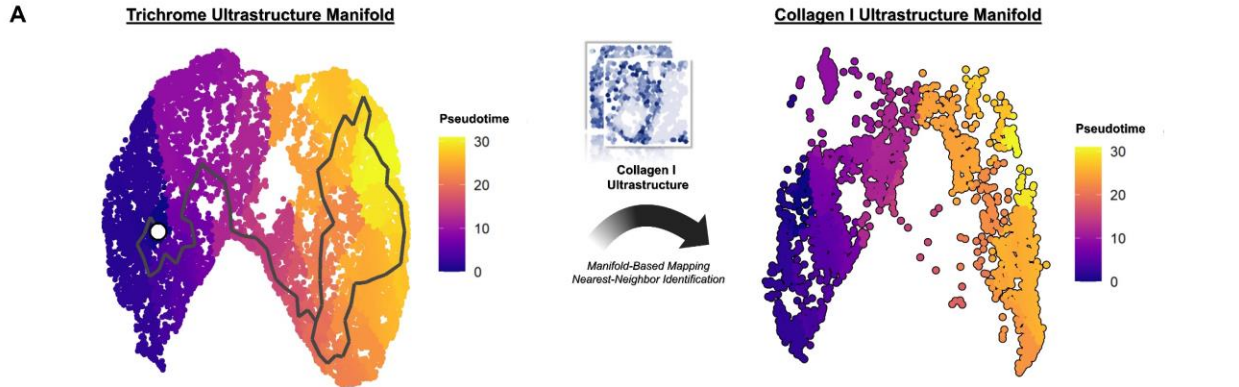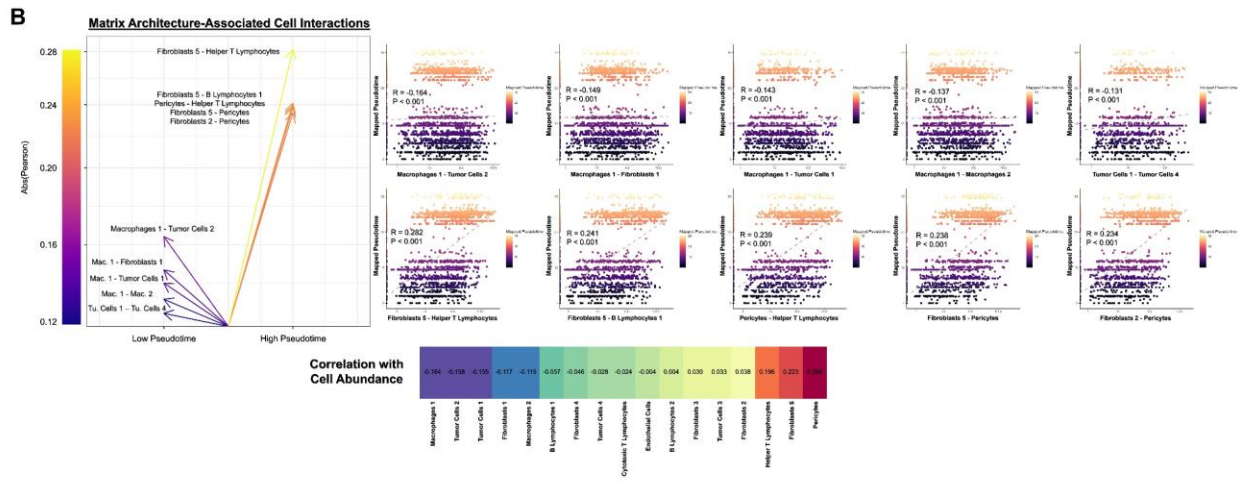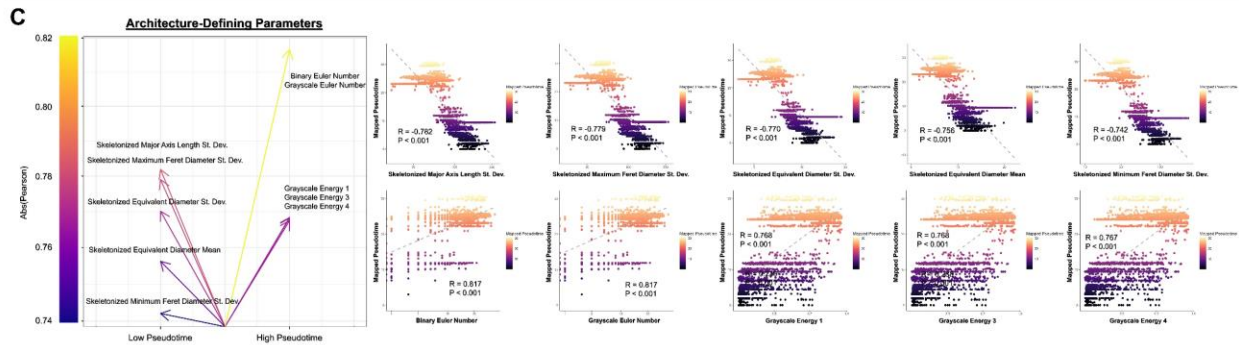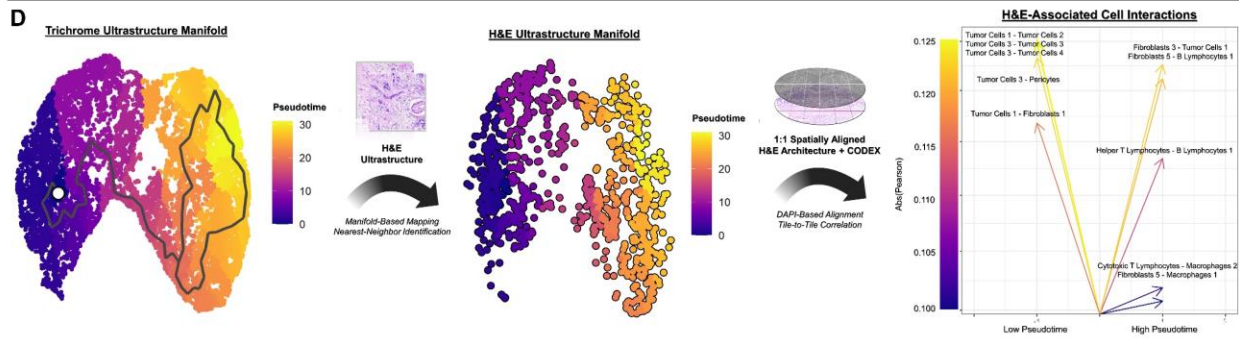

**Figure S7: Integration of matrix ultrastructural analysis with CODEX, related to Figures 1 and 2. (A)**

Mapping of collagen I ultrastructure and trichrome ultrastructure using model transformation in *Monocle3* and nearest neighbor identification in *RANN*. **(B)** Identification of top 5 CODEX cell interactions correlated with low and high matrix pseudotime (top), as well as cell type abundances correlated with low and high matrix pseudotime (bottom). **(C)** Identification of top 5 ultrastructural parameters correlated with low and high matrix pseudotime. **(D)** Mapping of H&E to trichrome, followed by one-to-one spatial alignment to CODEX using DAPI mask and identification of top cell interactions correlated with H&E matrix architecture.

**A**

## Sequential Feature Selection

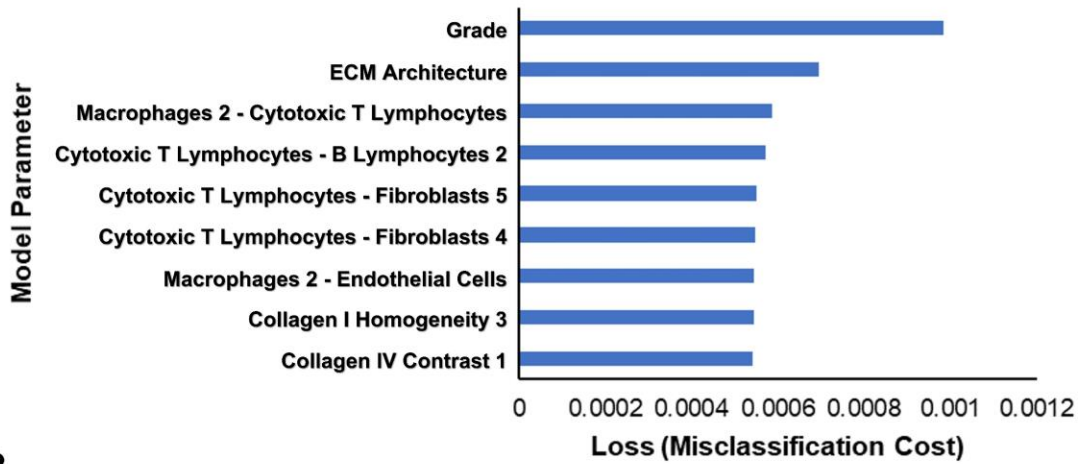

**B**

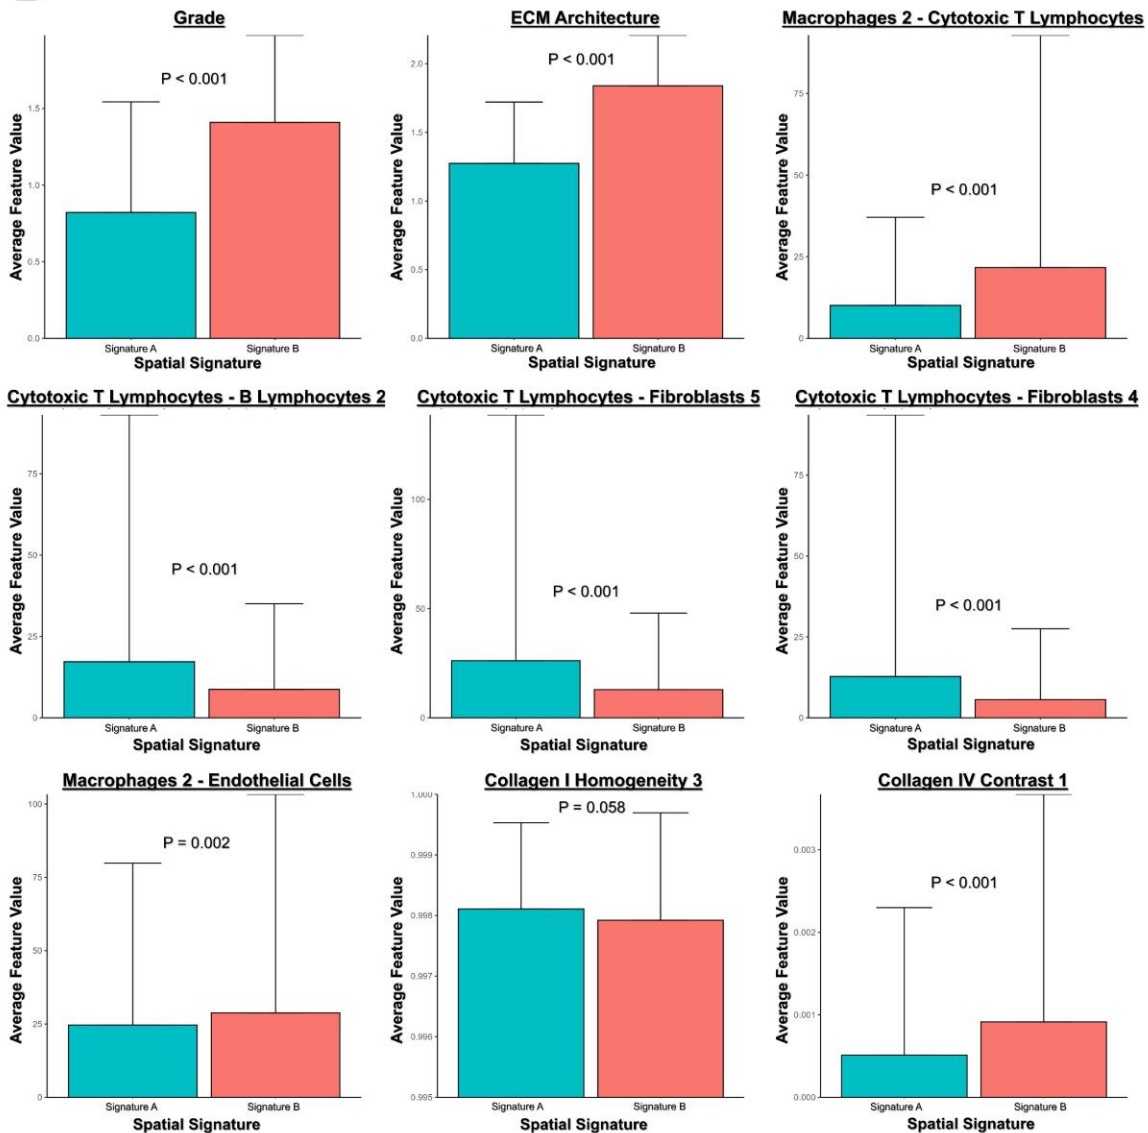



**Figure S8: Generation of compact feature set for machine learning-based spatial signature using sequential feature selection in MATLAB, related to Figure 7.** (A) Progression of lower misclassification costs produced by forward selection of features. Additional features beyond this selection generated no further improvement to misclassification cost on the training dataset. (B) Average feature values for the subsample-level training data.

| Characteristic                         |                                             | TMA          | Stanford      | UVA          |
|----------------------------------------|---------------------------------------------|--------------|---------------|--------------|
| All specimens                          |                                             | n = 359      | n = 159       | n = 148      |
|                                        | Median age (range) - yr                     | 55 (23-80)   | 71 (26-90)    | 66 (40-90)   |
|                                        | Gender - no. (%)                            |              |               |              |
|                                        | Male                                        | 143 (40)     | 83 (52)       | 70 (47)      |
|                                        | Female                                      | 100 (28)     | 68 (43)       | 78 (53)      |
|                                        | NA                                          | 116 (33)     | 8 (5)         | 0 (0)        |
|                                        | Pathology - no. (%)                         |              |               |              |
|                                        | Normal                                      | 36 (10)      | 0 (0)         | 0 (0)        |
|                                        | PDAC                                        | 245 (68)     | 138 (87)      | 147 (99)     |
|                                        | Other neoplasm                              | 78 (22)      | 21 (13)       | 1 (1)        |
| PDAC only<br>(included in<br>analysis) |                                             | n = 239      | n = 128       | n = 146      |
|                                        | Disease stage - no. (%)                     |              |               |              |
|                                        | 1a-1b                                       | 86 (36)      | 24 (19)       | 35 (24)      |
|                                        | 2a-2b                                       | 138 (58)     | 70 (55)       | 92 (63)      |
|                                        | 3                                           | 5 (2)        | 34 (27)       | 19 (13)      |
|                                        | NA                                          | 10 (4)       | 0 (0)         | 0 (0)        |
|                                        | Grade - no. (%)                             |              |               |              |
|                                        | 0                                           | 42 (18)      | 24 (19)       | 12 (8)       |
|                                        | 0.5-1                                       | 116 (49)     | 58 (45)       | 51 (35)      |
|                                        | 1.5-2                                       | 63 (26)      | 29 (23)       | 69 (47)      |
|                                        | NA                                          | 18 (8)       | 17 (13)       | 14 (10)      |
|                                        | Median tumor size (range) - cm              | -            | 3 (0.25-13)   | 3 (0.5-8.5)  |
|                                        | Median lymph nodes (range) - no.            | -            | 24 (10-86)    | 22 (0-53)    |
|                                        | Median pre-op CA19-9 (range)                | -            | 166 (0-53704) | 63 (2-22720) |
|                                        | Neoadjuvant chemotherapy - no. (%)          | -            | 28 (22)       | 63 (43)      |
|                                        | Median disease-free survival (range) - days | -            | 386 (8-2034)  | 347 (8-2582) |
| Median overall survival (range) - days | -                                           | 503 (8-2034) | 439 (8-2661)  |              |

**Table S1: Patient characteristics by cohort origin (third-party tissue microarray, Stanford Hospital, and University of Virginia University Hospital), related to Figure 1.**

| Cluster/Cell Annotation | Rationale                                                                                                                                                                      |
|-------------------------|--------------------------------------------------------------------------------------------------------------------------------------------------------------------------------|
| B Lymphocytes 1         | CD20 <sup>high</sup> , HLA-DR <sup>high</sup> , IL6 <sup>high</sup> , Vimentin <sup>high</sup> , FAP, YAP <sup>low</sup> , CD56, CTLA4                                         |
| B Lymphocytes 2         | CD20 <sup>low</sup> , HLA-DR <sup>low</sup> , IL6 <sup>low</sup> , Vimentin <sup>low</sup> , FAP <sup>low</sup> , CD56, CTLA4 <sup>low</sup>                                   |
| Endothelial Cells       | CD31, MGP <sup>high</sup> , COL1 <sup>low</sup>                                                                                                                                |
| Fibroblasts 1           | PDGFRa <sup>med</sup> , CD26 <sup>low</sup> , aSMA <sup>low</sup> , IL6 <sup>med</sup> , PDL1 <sup>low</sup> , YAP <sup>low</sup> , COL1 <sup>low</sup> , COLIV <sup>low</sup> |
| Fibroblasts 2           | PDGFRa <sup>high</sup> , CD26 <sup>med</sup> , aSMA <sup>low</sup> , IL6 <sup>low</sup> , PDL1 <sup>low</sup> , Fibronectin <sup>low</sup>                                     |
| Fibroblasts 3           | PDGFRa <sup>high</sup> , CD26 <sup>high</sup> , aSMA <sup>med</sup> , IL6 <sup>low</sup> , PDL1, COLIV, Fibronectin <sup>low</sup>                                             |
| Fibroblasts 4           | PDGFRa <sup>med</sup> , CD26 <sup>high</sup> , aSMA <sup>high</sup> , IL6 <sup>med</sup> , PDL1, COL1 <sup>low</sup> , COLIV, Fibronectin <sup>low</sup>                       |
| Fibroblasts 5           | PDGFRa <sup>med</sup> , CD26 <sup>low</sup> , aSMA <sup>med</sup> , IL6 <sup>high</sup> , PDL1, YAP, COL1 <sup>low</sup> , COLIV, Fibronectin <sup>low</sup>                   |
| Macrophages 1           | CD68, HLA-DR <sup>low</sup> , HLA1, IL6                                                                                                                                        |
| Macrophages 2           | CD68, HLA-DR <sup>high</sup> , HLA1, IL6                                                                                                                                       |
| Pericytes               | aSMA <sup>high</sup> , MGP, COL1 <sup>med</sup> , IL6 <sup>high</sup> , IL1b <sup>high</sup>                                                                                   |
| Helper T Lymphocytes    | CD4 <sup>high</sup> , CD8 <sup>low</sup> , S100A4, HLA-DR, HLA1, Ki67                                                                                                          |
| Cytotoxic T Lymphocytes | CD4 <sup>low</sup> , CD8 <sup>high</sup> , S100A4, HLA-DR, HLA1, Ki67                                                                                                          |
| Tumor Cells 1           | E-cadherin <sup>low</sup> , PANCK <sup>med</sup> , PDL1 <sup>low</sup> , SDF1 <sup>low</sup> , HLA1 <sup>low</sup> , Vimentin <sup>low</sup> , FAP <sup>low</sup>              |
| Tumor Cells 2           | E-cadherin <sup>med</sup> , PANCK <sup>med</sup> , PDL1 <sup>med</sup> , SDF1 <sup>med</sup> , HLA1 <sup>med</sup>                                                             |
| Tumor Cells 3           | E-cadherin <sup>high</sup> , PANCK <sup>high</sup> , PDL1 <sup>med</sup> , SDF1 <sup>high</sup> , HLA1 <sup>high</sup>                                                         |
| Tumor Cells 4           | E-cadherin <sup>high</sup> , PANCK <sup>med</sup> , PDL1 <sup>high</sup> , SDF1 <sup>high</sup> , HLA1 <sup>high</sup>                                                         |

**Table S2: Characteristic protein expression by CODEX-defined cell populations, related to Figure 2.**

|                          | Artificial Neural Network (ANN) | Generalized Additive Model (GAM) | K-Nearest Neighbor (KNN) Model | Linear Discriminant Analysis (LDA) | Random Forest (RF) | Support Vector Machine (SVM) |
|--------------------------|---------------------------------|----------------------------------|--------------------------------|------------------------------------|--------------------|------------------------------|
| <b>AUC</b>               | 0.902617                        | 0.872331                         | 0.899993                       | 0.881663                           | 0.885204           | 0.880519                     |
| <b>Sensitivity</b>       | 0.916409                        | 0.934985                         | 0.897833                       | 0.894737                           | 0.934985           | 0.928793                     |
| <b>Specificity</b>       | 0.815331                        | 0.804878                         | 0.80662                        | 0.815331                           | 0.783972           | 0.797909                     |
| <b>Balanced Accuracy</b> | 0.865869                        | 0.869931                         | 0.852226                       | 0.855033                           | 0.859478           | 0.863350                     |

**Table S3: Performance metrics for machine learning models on independent, blinded testing dataset, related to Figure 7.**
